# Supplementary material
Source: PubMed Central journal article supplement (PMC1726511)
Supplement: emermedj_21_6_724__1.pdf [file emermedj_21_6_724__1.pdf]

## Ambulance Staff Survey on Alternative Response Schemes SYAS Paramedic Practitioners

Occupation / grade:    Urgent crew    Technician    Paramedic

Number of years with ambulance service:

### Level of awareness of PP scheme

Did you know there was a PP scheme in Sheffield?

Y / N

If Yes:

What do you know about the scheme?

|          |                              |                             |                |                                    |                                                         |                                    |                                                       |       |
|----------|------------------------------|-----------------------------|----------------|------------------------------------|---------------------------------------------------------|------------------------------------|-------------------------------------------------------|-------|
| Over 60s | 999 calls (+urgent not seen) | minor injuries / conditions | home treatment | ED fast tracking eg to radiography | Involves paramedics with additional training and skills | Can include social aspects of care | Calls referred to the scheme by other ambulance crews | other |
|----------|------------------------------|-----------------------------|----------------|------------------------------------|---------------------------------------------------------|------------------------------------|-------------------------------------------------------|-------|

Have you referred to the scheme?

|    |      |           |          |
|----|------|-----------|----------|
| No | Once | 1-5 times | >5 times |
|----|------|-----------|----------|

– if yes, any problems with this?

|    |                             |                        |         |                                |                      |                  |        |
|----|-----------------------------|------------------------|---------|--------------------------------|----------------------|------------------|--------|
| No | Time delay to PP attendance | Leaving patients alone | PP busy | PP not contactable via control | PP refused to attend | PP on “off week” | Other: |
|----|-----------------------------|------------------------|---------|--------------------------------|----------------------|------------------|--------|

- if no, why not?

|                      |                      |                                     |            |       |
|----------------------|----------------------|-------------------------------------|------------|-------|
| No suitable patients | Disagree with scheme | Don't consider it good for patients | Don't know | other |
|----------------------|----------------------|-------------------------------------|------------|-------|

**Thoughts on the PP scheme**

Have you received adequate information about the scheme itself (e.g. patient criteria)?

Y / N

What do you think have been the effects of PP scheme on traditional ambulance service duties?

|           |      |                                                        |
|-----------|------|--------------------------------------------------------|
| No effect |      |                                                        |
| Worse     | Why? | PPs still on the rota as paramedics but not available. |
|           |      | Other:                                                 |
| Better    | Why? | Clears 999 crews for “normal” emergencies quicker.     |
|           |      | Other:                                                 |

Should all paramedics be trained to the same level as the PPs?

Y / N

How do you think a PP is paid compared with an equivalently experienced paramedic?

More / less / same

What do you think the working conditions of a PP are like compared with an equivalently experienced paramedic?

Better / worse / same

Do you think ambulance staff already do what the PPs do anyway?

|              |                  |            |           |
|--------------|------------------|------------|-----------|
| All the time | Some of the time | Not really | No, never |
|--------------|------------------|------------|-----------|

Would you like to have the additional training and skills to assess and treat patients on scene as the PPs do?

Y / N

Do you think this is a good way of dealing with patients who call 999 but may not need urgent transport and hospital treatment?

Y / N / DK

If no, why not and what other mechanisms can you suggest?

Are there other groups of patients who should receive this type of service?

Y / N / DK

If yes, which?            All.            Other:

Were the PPs selected in a fair and appropriate manner?

Y / N / DK

If no, why not?

What do you understand to be the reason why such alternative response schemes like this are being promoted?

|                                                                                                                                         |
|-----------------------------------------------------------------------------------------------------------------------------------------|
| To reduce the number of older people having a poor experience in the ED, especially when they don't clinically need to be there anyway. |
|-----------------------------------------------------------------------------------------------------------------------------------------|

|        |
|--------|
| Other: |
|--------|

### **Knowledge of PP research project**

Do you know if the PP scheme is part of a research trial at present?

Y / N / DK

*The PP scheme is part of a research trial at present.*

Is it important that the PP scheme is evaluated fully by a research trial?

|           |            |               |
|-----------|------------|---------------|
| Important | Don't know | Not important |
|-----------|------------|---------------|

Do you know why the PP scheme is not always operational one week to the next?

|                                                          |       |    |
|----------------------------------------------------------|-------|----|
| To allow randomisation of patients for research purposes | Other | No |
|----------------------------------------------------------|-------|----|

**Views on SYAS**

Do you enjoy your job – use scale below:

|              |  |               |
|--------------|--|---------------|
| Very<br>much |  | Not at<br>all |
|              |  |               |

Do you think SYAS is a good employer?

|           |      |         |               |      |
|-----------|------|---------|---------------|------|
| excellent | good | average | below average | poor |
|           |      |         |               |      |

**Other Issues**

The national shortage of doctors will become more acute in the next few years especially at junior doctor level, do you think paramedics could / should work as part of an in-hospital team dealing with emergencies?

Y / N / DK

**Any other comments**
