# Supplementary material
Source: PubMed Central journal article supplement (PMC1726511)
Supplement: emermedj_21_6_724__2.pdf [file emermedj_21_6_724__2.pdf]

## Ambulance Control Staff Survey on Alternative Response Schemes SYAS Paramedic Practitioners

Occupation / grade:                    EMD    DM

Number of years with ambulance service:

### **Level of awareness of PP scheme**

Do you think this is a good way of dealing with patients who call 999 but may not need urgent transport and hospital treatment?

Y / N / DK

If no, why not and what other mechanisms can you suggest?

Are there other groups of patients who should receive this type of service?

Y / N / DK

If yes, which?                    All.                    Other:

### **Thoughts on the PP scheme**

Have you received adequate information about the scheme itself (e.g. patient criteria)?

Y / N

What do you think have been the effects of PP scheme on traditional ambulance service duties?

|           |      |                                                        |
|-----------|------|--------------------------------------------------------|
| No effect |      |                                                        |
| Worse     | Why? | PPs still on the rota as paramedics but not available. |
|           |      | Other:                                                 |
| Better    | Why? | Clears 999 crews for “normal” emergencies quicker.     |
|           |      | Other:                                                 |

**Control Specific Issues**

Has it been useful to have a PP in control?

Very useful Useful Not bothered Not Useful Didn't know there was one

Have you used the PP in control for general advice not related to PP scheme patients (e.g. advice on incidents where patients are under 60?)

Y / N

Has the PP scheme made your job easier?

Yes DK No

What is your view on having the responsibility of passing calls to the PP scheme.

Its fine No opinion I am already too busy and can't do anymore

How do you think we could further improve the number of calls appropriately routed to the PPs?

**Views on SYAS**

Do you enjoy your job – use scale below:

|              |               |
|--------------|---------------|
| Very<br>much | Not at<br>all |
|              |               |

Do you think SYAS is a good employer?

|           |      |         |               |      |
|-----------|------|---------|---------------|------|
| excellent | good | average | below average | poor |
|           |      |         |               |      |

Please tick in the PP? column which of the following events would be appropriate for an intervention by a Paramedic Practitioner.

If the event is not appropriate for a Paramedic Practitioner please circle the part or parts of the sentence that makes it inappropriate.

| Caller Information                                                                                                                                                       | PP? |
|--------------------------------------------------------------------------------------------------------------------------------------------------------------------------|-----|
| A 40 year old man having an asthma attack.                                                                                                                               |     |
| A 61 year old man who grazed his head and got a nosebleed after banging into the sink whilst doing some tiling in his bathroom.                                          |     |
| A report from the police of an 18 year old with a minor cut that the police think could be quickly sutured, thus saving them all a trip to minor injuries.               |     |
| A 100 year old lady who tripped and fell over the flex to the TV whilst going to make her self a cup of tea. She is conscious and a bit embarrassed to have fallen over. |     |
| A retired male who has slipped and fallen over in the hallway of his house. He complains of pain in his leg.                                                             |     |
| A 56 year old man who has a minor scald to the fingers of his left hand.                                                                                                 |     |
| A football player who has collapsed whilst playing and is reported to be not breathing.                                                                                  |     |
| An old man found on the floor of his kitchen by his neighbour. The old man says he can't really remember what happened.                                                  |     |
| A GP phones regarding an urgent admission to A&E who the GP has not been able to see of a 76 year old lady with a hip injury following slipping in her kitchen.          |     |
| A message from Meadowhall security who have an 87 year old man in their first aid room at Meadowhall with a cut to the back of his head following a fall.                |     |

**Any other comments**
